# Supplementary material for: Isoporous Membranes from Novel Polystyrene-b-poly(4-vinylpyridine)-b-poly(solketal methacrylate) (PS-b-P4VP-b-PSMA) Triblock Terpolymers and Their Post-Modification
Source: PubMed Central journal article supplement (PMC7023574; doi:10.3390/polym12010041), 2019-12-26
Supplement: polymers-12-00041-s001.pdf [file polymers-12-00041-s001.pdf]

1 Supporting Information

2 **Isoporous Membranes from Novel**  
 3 **polystyrene-*b*-poly(4-vinylpyridine)-*b*-poly(solketal**  
 4 **methacrylate) (PS-*b*-P4VP-*b*-PSMA) Triblock**  
 5 **Terpolymers and their Post-modification**

6 Sarah Saleem<sup>1</sup>, Sofia Rangou<sup>1</sup>, Clarissa Abetz<sup>1</sup>, Volkan Filiz<sup>1</sup>, Volker Abetz<sup>1,2\*</sup>

7 1. Helmholtz-Zentrum Geesthacht, Institute of Polymer Research, Max-Planck-Str.1, 21502 Geesthacht,  
 8 Germany.

9 2. Universität Hamburg, Institute of Physical Chemistry, Martin-Luther-King-Platz 6, 20146 Hamburg,  
 10 Germany.

11 \* Correspondence: E-Mail: volker.abetz@hzg.de, Tel: +49 4152 872461

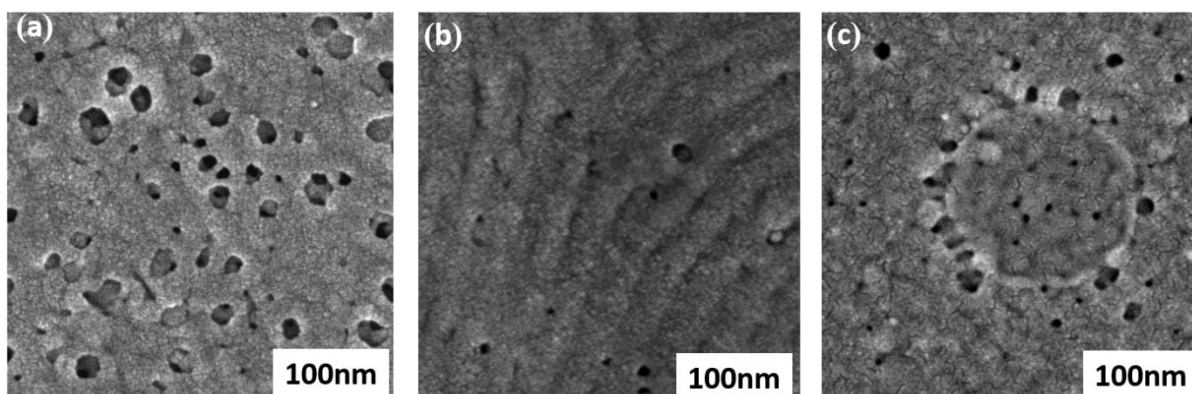

12

13 **Figure 1.** SEM images of PS<sub>71</sub>-*b*-P4VP<sub>26</sub>-*b*-PSMA<sub>3</sub><sup>145</sup> membrane surfaces prepared from different  
 14 solutions: 22 wt% copolymer in (a) 60/40 THF/DMF; (b) 50/50 THF/DMF; (c) 70/30 THF/DMF. The  
 15 evaporation time before immersion into the precipitant was 10 seconds for the three different  
 16 concentrations.

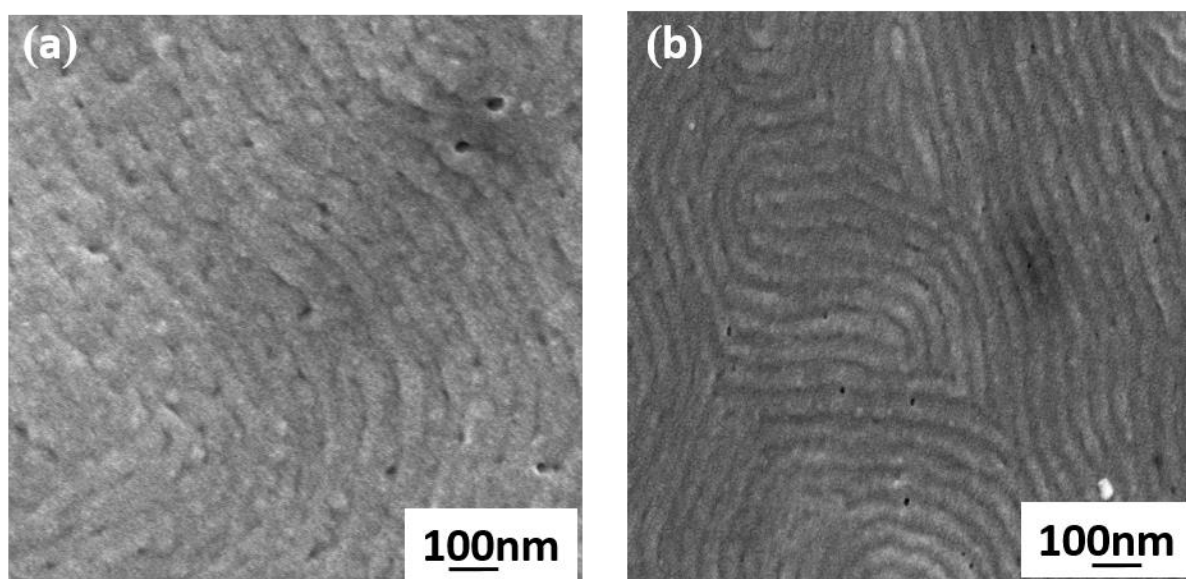

17

18

19 **Figure 2.** SEM images of the surfaces of  $PS_{71}\text{-}b\text{-}P_{4VP}_{26}\text{-}b\text{-}PSMA_{3145}$  membranes cast from a 22 wt%  
20 copolymer solution in (a) THF/DMF/DOX 1/1/1 (b) THF/DMF/DOX 40/30/30. The evaporation time  
21 before immersion into the precipitant was 10 seconds.

22

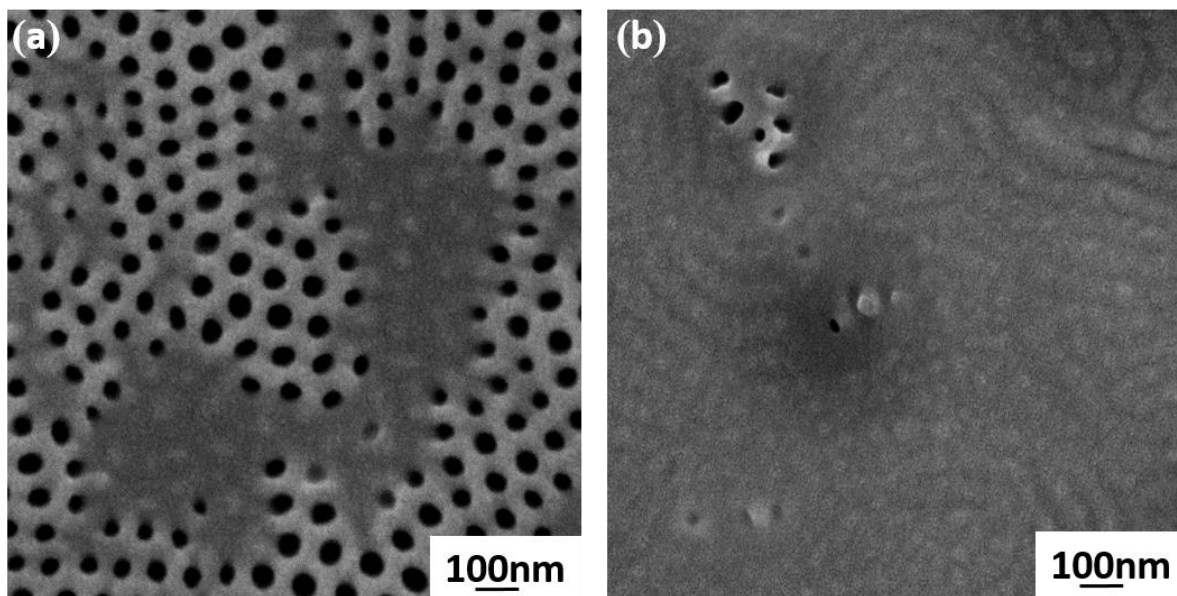

23

24 **Figure 3.** SEM images of the surfaces of  $PS_{71}\text{-}b\text{-}P_{4VP}_{26}\text{-}b\text{-}PSMA_{3145}$  membranes cast from solutions  
25 THF/DMF/Acetone: 50/30/20 wt%. (a) 20 seconds (b) 30 seconds evaporation time before immersion  
26 into non-solvent bath.

27

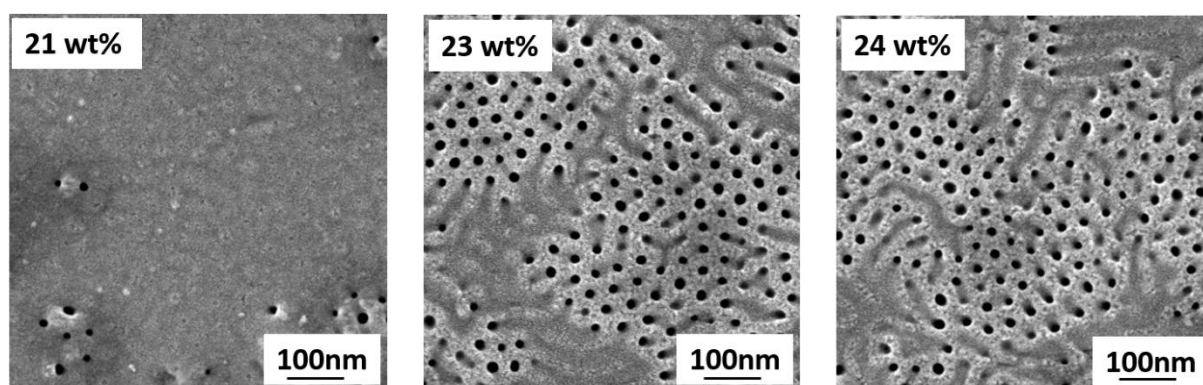

28

29 **Figure 4.** SEM images of the surfaces of  $PS_{71}\text{-}b\text{-}P_{4VP}_{26}\text{-}b\text{-}PSMA_{3145}$  membranes cast from 21 wt%,  
30 23wt%, 24wt% copolymer solutions in THF/DMF/Acetone: 50/30/20 wt%. The evaporation time  
before immersion into the precipitant was 10 seconds.

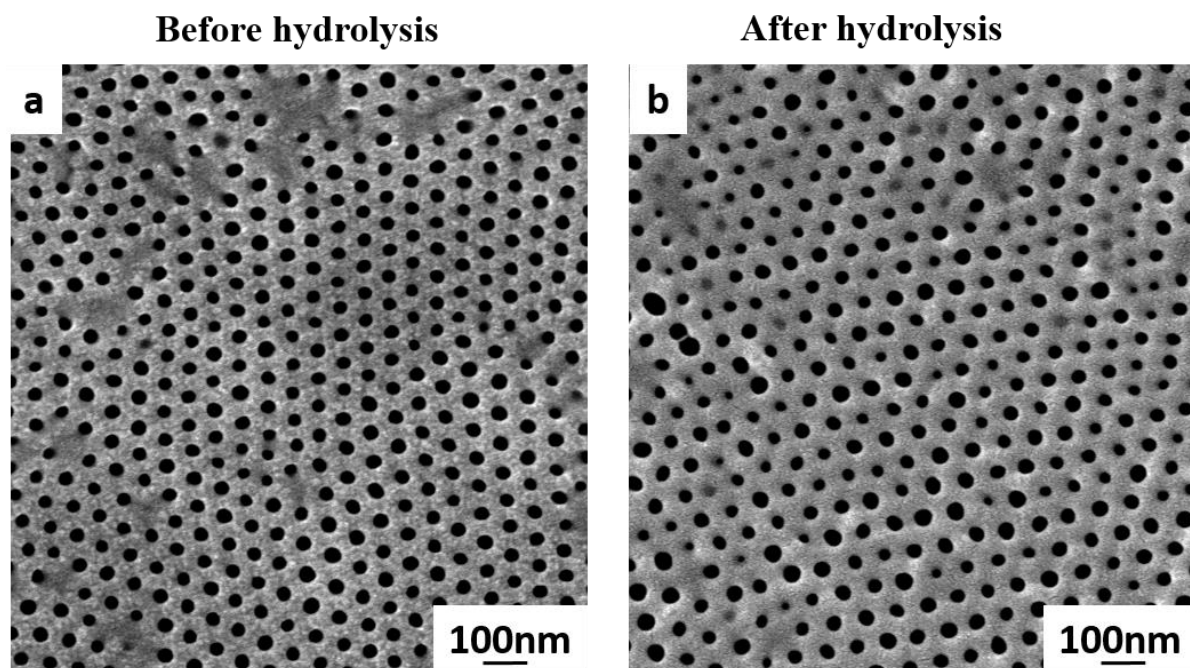

31

32

33

34

**Figure 5.** SEM images of the surface of (a) pristine  $PS_{70}\text{-}b\text{-}P4VP_{25}\text{-}b\text{-}PSMA_{5}^{143}$  membrane and (b)  $PS_{70}\text{-}b\text{-}P4VP_{25}\text{-}b\text{-}PGMA_{5}^{143}$  membrane after acidic hydrolysis. The evaporation time before immersion into water bath was 10 seconds.

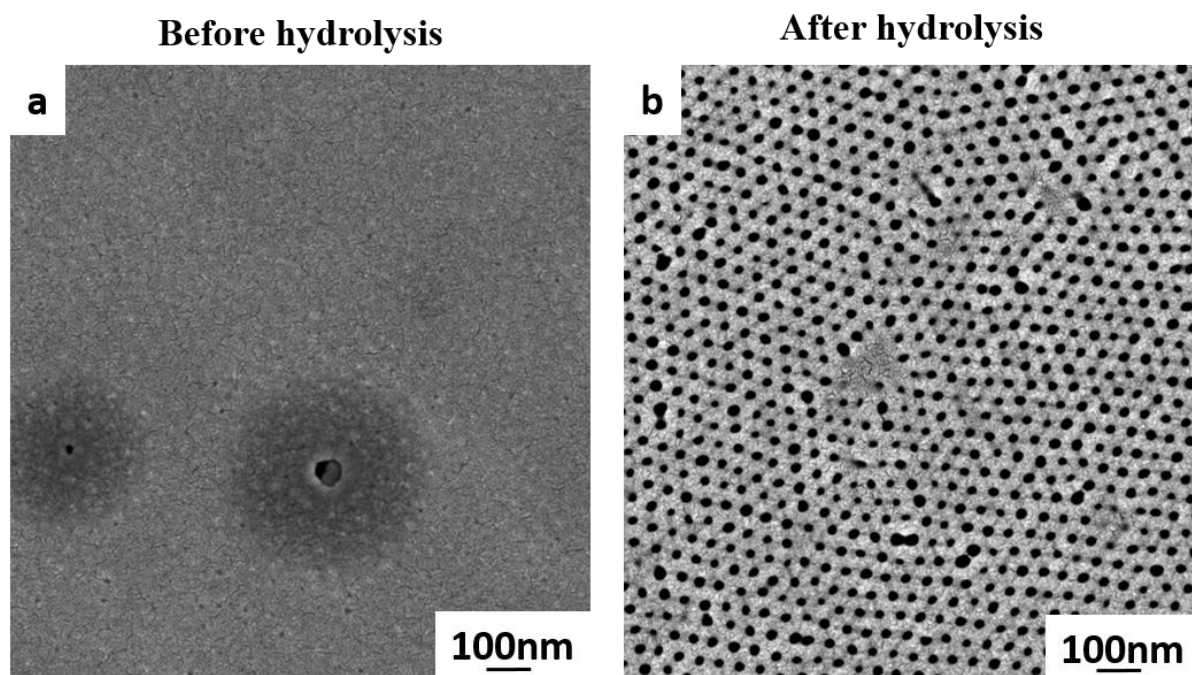

35

36

37

38

**Figure 6.** SEM images of (a)  $PS_{71}\text{-}b\text{-}P4VP_{17}\text{-}b\text{-}PSMA_{12}^{91}$  membrane (b)  $PS_{71}\text{-}b\text{-}P4VP_{17}\text{-}b\text{-}PGMA_{12}^{91}$  membrane obtained after acidic hydrolysis. The evaporation time before immersion into water bath was 10 seconds.

39

40

Table 1. Comparison of dynamic contact angle values of  $PS_{71}\text{-}b\text{-}P4VP_{26}\text{-}b\text{-}PSMA_{3}^{145}$  and  $PS_{71}\text{-}b\text{-}P4VP_{26}\text{-}b\text{-}PGMA_{3}^{145}$  triblock terpolymer membranes.

| PS <sub>71</sub> - <i>b</i> -P4VP <sub>26</sub> - <i>b</i> -PSMA <sub>3</sub> <sup>145</sup> | PS <sub>71</sub> - <i>b</i> -P4VP <sub>26</sub> - <i>b</i> -PGMA <sub>3</sub> <sup>145</sup> |
|----------------------------------------------------------------------------------------------|----------------------------------------------------------------------------------------------|
| (°)                                                                                          | (°)                                                                                          |
| 63±1                                                                                         | 51±1                                                                                         |
| 61±0.5                                                                                       | 47±3                                                                                         |
| 56±2                                                                                         | 38±2                                                                                         |
| 49±1                                                                                         | 37±3                                                                                         |
| 45±1                                                                                         | 34±3                                                                                         |
| 43±0.46                                                                                      | 27±3                                                                                         |
| 39±3                                                                                         | 22±1                                                                                         |
| 34±2                                                                                         | 17±2                                                                                         |
| 30±1                                                                                         | 13±1                                                                                         |
| 25±4                                                                                         | 9±1                                                                                          |
| 16±5                                                                                         |                                                                                              |

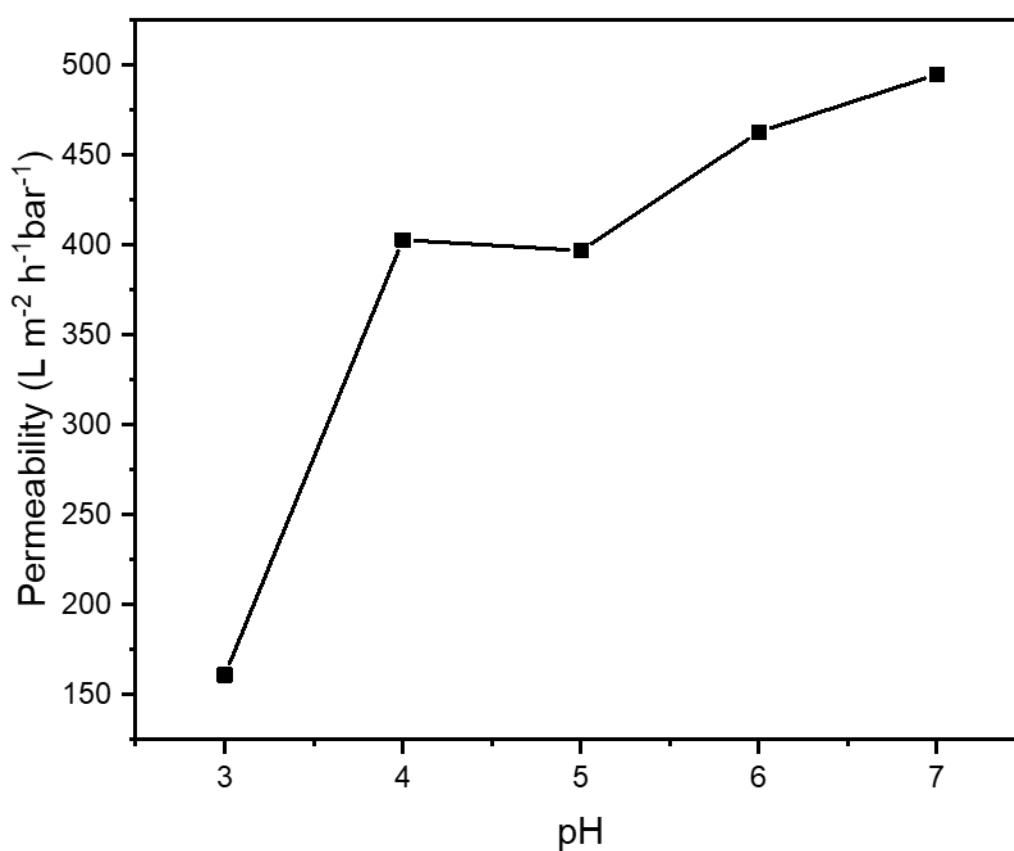

41

42

43

44

**Figure 7.** Water permeabilities of PS<sub>71</sub>-*b*-P4VP<sub>26</sub>-*b*-PGMA<sub>3</sub><sup>145</sup> membrane measured at various pH, at pH > 4 high water permeability was observed, due to deswelling of the deprotonated P4VP blocks at larger pH, leading to their collapse on the pore walls.

45
